# Supplementary material for: Synthesis, Characterization, Antibacterial Properties, and In Vitro Studies of Selenium and Strontium Co-Substituted Hydroxyapatite
Source: MDPI journal article supplement (doi:10.3390/ijms22084246), 2021-04-19
Supplement: s1 [file s1]

## Supplementary Information

### S 1: EDS data

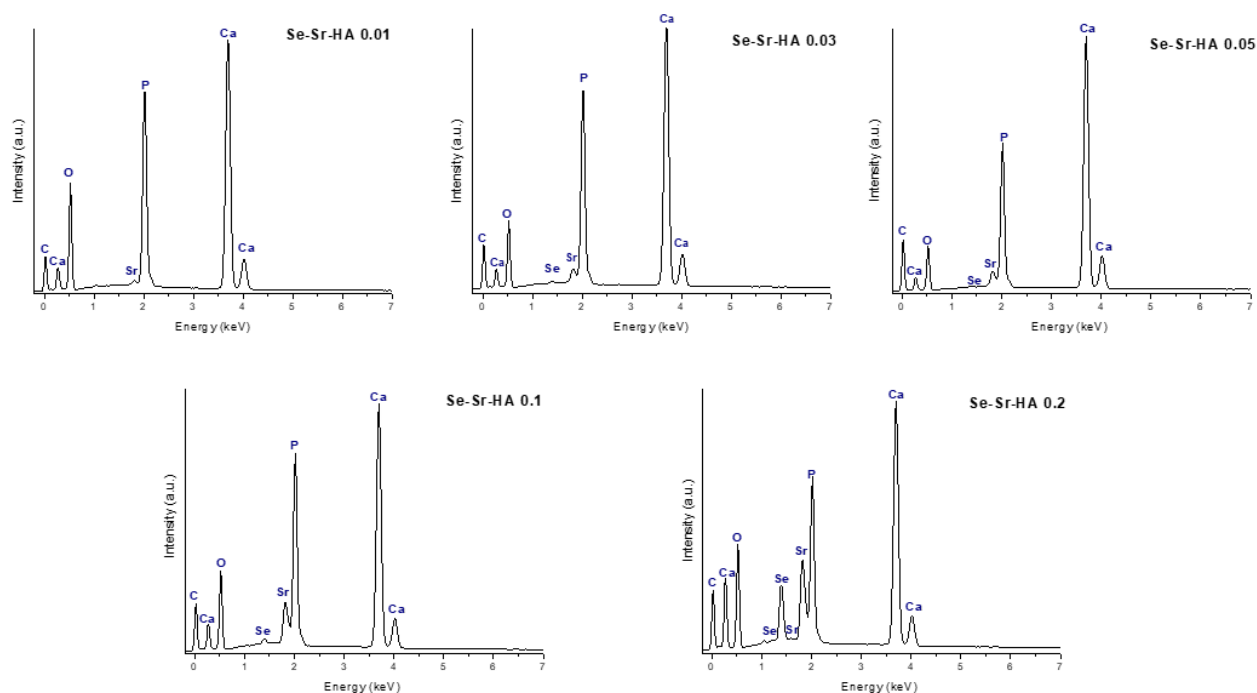

Figure S1: EDS spectra of Se-Sr-HA 0.01, Se-Sr-HA 0.03, Se-Sr-HA 0.05, Se-Sr-HA 0.1, & Se-Sr-HA 0.2

The compositional analysis of selenium strontium co-substituted HA by EDS also confirmed the presence of selenium and strontium in the samples. The EDS results are in good agreement with the compositional data by XRF. By XRF, EDS and XRD results, we believe that  $\text{SeO}_3^{2-}$  and  $\text{Sr}^{2+}$  ions were successfully substituted in the HA lattice.

### S 2: SBF Preparation

The SBF was prepared using the components in Table S1 according to the Kokubo and Takadama method [45]. At the start of SBF preparation, reagents in the order 1 – 8 (Table S1) were sequentially added and dissolved in 750 mL of distilled water taken from the ELGA DV 25 (PURELAB Option R7BP, Wycombe, United Kingdom) in a container, which was held at a temperature range of  $36\text{ }^{\circ}\text{C} \pm 1\text{ }^{\circ}\text{C}$  whilst being magnetically stirred. Following complete reagents dissolution, distilled water was poured to rise the overall volume to 900 mL. In the following step TRIS (order 9) was added at a temperature range of  $36\text{ }^{\circ}\text{C} \pm 1\text{ }^{\circ}\text{C}$  (1). pH monitoring was performed using a 3510 pH meter (Bibby Scientific Limited, Staffordshire, UK). TRIS was added till the pH was enhanced to  $7.30 \pm 0.05$ . Subsequently, TRIS was added in a temperature window of  $36\text{ }^{\circ}\text{C} \pm 0.5\text{ }^{\circ}\text{C}$  until a pH value of  $7.45 \pm 0.01$  was attained. Hydrochloric acid (order 10) was then added to reduce the pH value to  $7.42 \pm 0.01$ . In the last phase, distilled water was poured to get a final volume of 1 litre.

Table S1: Recipe for preparation of SBF according to Kokubo [45]

| Order | Reagent                                                                                         | Distributor                                                                   | Purity       | Amount   |
|-------|-------------------------------------------------------------------------------------------------|-------------------------------------------------------------------------------|--------------|----------|
|       | Distilled water                                                                                 | -                                                                             | -            | ≥ 900 mL |
| 1     | Sodium chloride (NaCl)                                                                          | GPR RECAPTURE®<br>VWR International                                           | > 99 %       | 7.9948 g |
| 2     | Sodium bicarbonate<br>(NaHCO <sub>3</sub> )                                                     | ACS reagent Merck<br>KGaA                                                     | 99.7 %       | 0.3543 g |
| 3     | Potassium chloride (KCl)                                                                        | EMSURE® Merck<br>KGaA                                                         | 99.7 %       | 0.225 g  |
| 4     | Potassium phosphate dibasic trihydrate<br>(K <sub>2</sub> HPO <sub>4</sub> · 3H <sub>2</sub> O) | ReagentPlus® Merck<br>KGaA                                                    | 99.7 %       | 0.231 g  |
| 5     | Magnesium chloride hexahydrate (MgCl <sub>2</sub> · 6H <sub>2</sub> O)                          | ACS reagent Merck<br>KGaA                                                     | 100 %        | 0.3303 g |
| 6     | Hydrochloric acid (HCl)                                                                         | AnalaR NORMAPUR®<br>Reag. Ph. Eur.<br>analytical reagent<br>VWR International | 1 mole/litre | 39 mL    |
| 7     | Calcium chloride dihydrate (CaCl <sub>2</sub> · 2H <sub>2</sub> O)                              |                                                                               | 100 %        | 0.3638 g |
| 8     | Sodium sulphate anhydrous (Na <sub>2</sub> SO <sub>4</sub> )                                    |                                                                               | 99.6 %       | 0.0716 g |
| 9     | Tris(hydroxymethyl)aminomethane                                                                 | GPR RECTAPUR®<br>VWR International                                            | 100 %        | 6.0568 g |
| 10    | Hydrochloric acid (HCl)                                                                         | Reag. Ph. Eur.<br>analytical reagent<br>VWR International                     | 1 mole/litre | 0 – 5 mL |
